# Supplementary material
Source: PubMed Central journal article supplement (PMC7395242)
Supplement: NIHMS1609970-supplement-Supplementary_Information.pdf [file NIHMS1609970-supplement-Supplementary_Information.pdf]

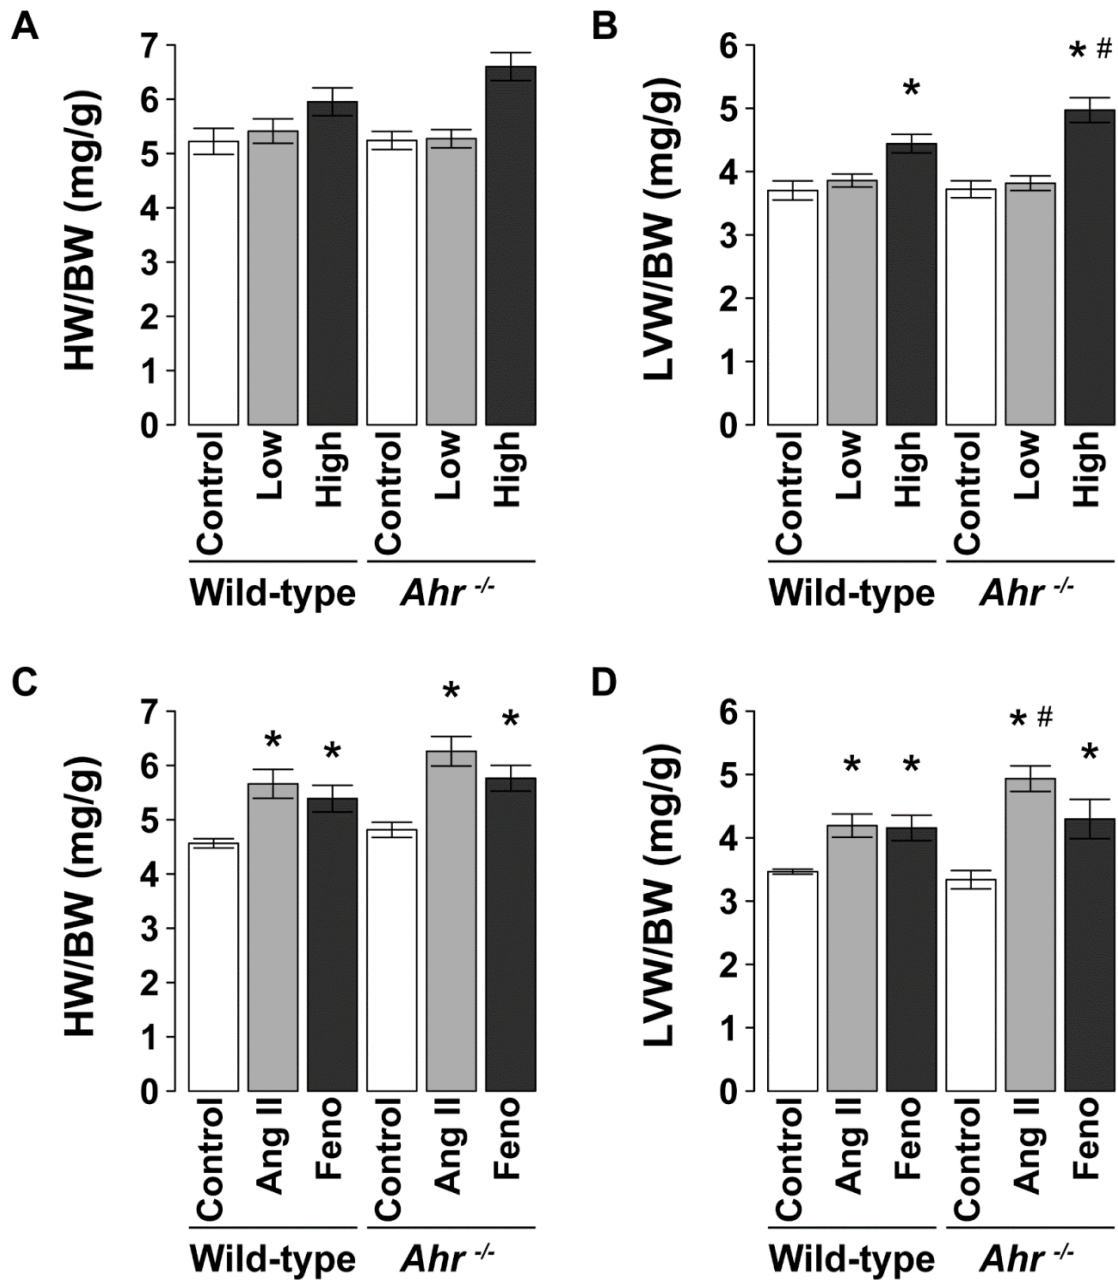

**Figure S1.** Effects of administration of Ang II on (A) heart weight/body weight and (B) LV weight/body weight in wild-type and *Ahr*<sup>-/-</sup> mice treated with low- or high-dose of Ang II. Effects of administration of Ang II and fenofibrate on (C) heart weight/body weight and (D) LV weight/body weight in wild-type and *Ahr*<sup>-/-</sup> mice treated with Ang II (at 100 ng/kg/min) and fenofibrate. Data are mean  $\pm$  SEM of eight mice per group. \* $P$ <0.05 vs. wild-type control mice; # $P$ <0.05 vs. wild-type Ang II mice.
